# Supplementary material
Source: PubMed Central journal article supplement (PMC2752202)
Supplement: NIHMS123360-supplement-1.pdf [file NIHMS123360-supplement-1.pdf]

## **Supplementary figures i-vii**

Targeted disruption of cocaine-activated accumbens neurons prevents context-specific sensitization

Eisuke Koya<sup>1</sup>, Sam A. Golden<sup>1</sup>, Brandon K. Harvey<sup>1</sup>, Danielle H. Guez<sup>1</sup>, Alexander Berkow<sup>1</sup>, Danielle E. Simmons<sup>1</sup>, Jennifer M. Bossert<sup>1</sup>, Sunila G. Nair<sup>1</sup>, Jamie L. Uejima<sup>1</sup>, Marcelo T. Marin<sup>1</sup>, Timothy Mitchell<sup>1</sup>, David Farquhar<sup>2</sup>, Sukhen Ghosh<sup>2</sup>, Brandi J. Mattson<sup>1</sup>, Bruce T. Hope<sup>1,3</sup>

<sup>1</sup>Behavioral Neuroscience Branch, IRP/NIDA/NIH/DHHS, 251 Bayview Drive, Baltimore, MD 21224, USA

<sup>2</sup>Department of Experimental Therapeutics, University of Texas M.D. Anderson Cancer Center, 1515 Holcombe Blvd., Houston TX 77030, USA

<sup>3</sup>Correspondence should be addressed to:

Dr. Bruce T. Hope  
Behavioral Neuroscience Branch  
IRP/NIDA/NIH  
251 Bayview Drive  
Baltimore, MD 21224  
Tel: 443-740-2825  
Fax: 443-740-2827  
E-mail: bhope@intra.nida.nih.gov

**Figure i**

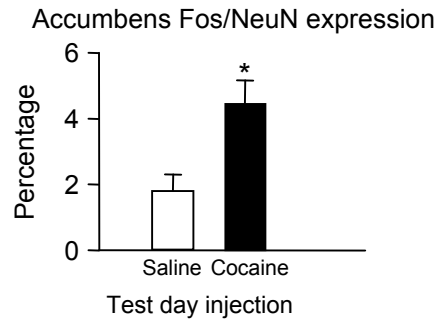

Figure i: Cocaine test injections increase the percentage of Fos-labeled nuclei in nucleus accumbens of sensitized wild-type rats. Values are expressed as mean $\pm$ SEM percentage of Fos-labeled nuclei over NeuN-labeled nuclei (n=4). \* Different from saline,  $p<0.05$ . Sample image is shown in Figure 1E.

## Figure ii

X-gal histochemistry of  $\beta$ -galactosidase

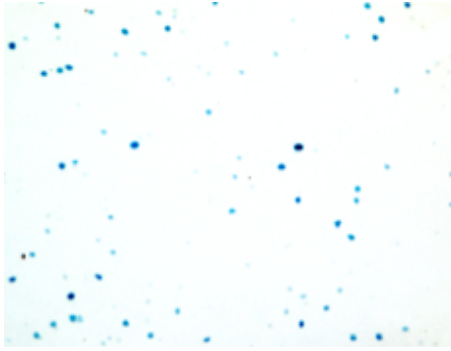

Figure ii: Cocaine-induced  $\beta$ -galactosidase in nucleus accumbens of *c-fos-lacZ* rats visualized using X-gal histochemistry. Dark blue ovals indicate  $\beta$ -galactosidase-labeled nuclei.

**Figure iii**

Daun02 effects in wild-type rats

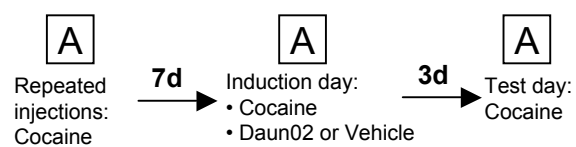

Cocaine-induced locomotion in wild-type rats

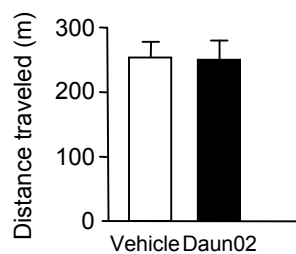

Figure iii: Daun02 on induction day did not attenuate subsequent cocaine-induced locomotor activity in wild-type rats on test day. Values are expressed as mean $\pm$ SEM distance traveled during 1 h following cocaine test injections (n=11).

**Figure iv**

Daun02 does not produce generalized damage

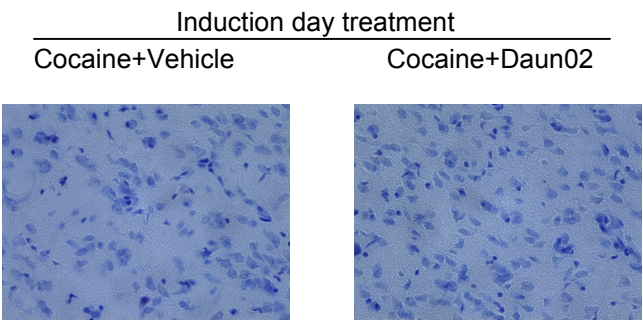

Figure iv: Cresyl violet staining of nucleus accumbens obtained on test day after prior treatment with cocaine and either Daun02 or vehicle on induction day in *c-fos-lacZ* rats from Experiment 2. Daun02 does not produce generalized damage in the nucleus accumbens.

## Figure v

### Experiment 4: Daun02 effects on saline test injections

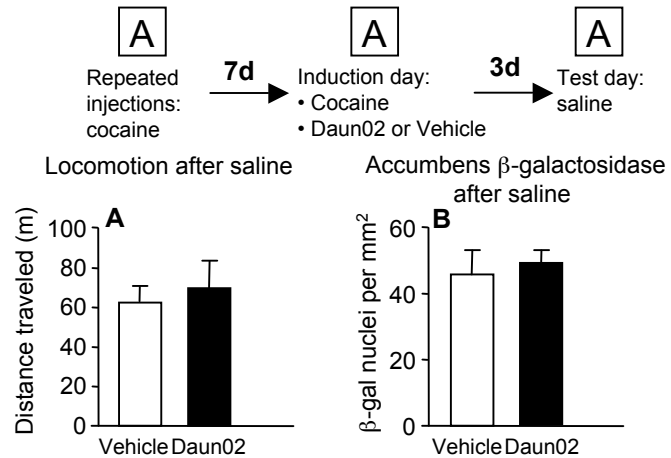

Figure v: Experiment 4: Daun02 did not alter locomotor activity (A) or  $\beta$ -galactosidase expression (B) in nucleus accumbens of *c-fos-lacZ* rats following saline test injections. Values are expressed as mean $\pm$ SEM distance traveled during 1 h following test injections (n=7-9) and mean $\pm$ SEM density of  $\beta$ -galactosidase-labeled nuclei in nucleus accumbens (n=5-7).

**Figure vi**

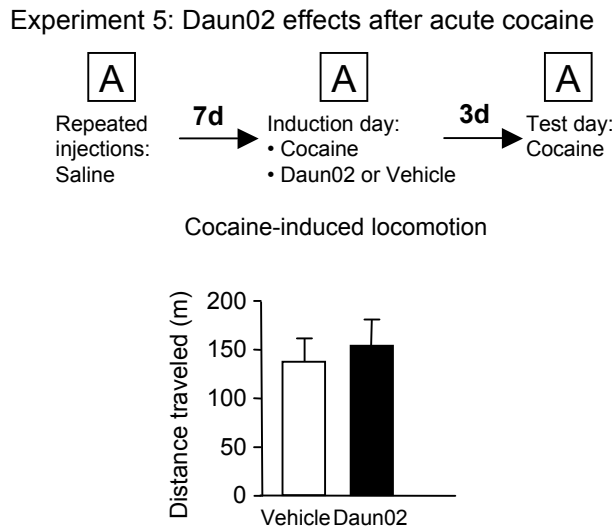

Figure vi: Experiment 5: Daun02 did not alter cocaine-induced locomotor activity on test day in *c-fos-lacZ* rats previously injected on induction day with acute cocaine prior to Daun02 infusions. Values are expressed as mean $\pm$ SEM distance traveled during 1 h following test injections (n=7-9).

**Figure vii**

**Accumbens infusion sites**

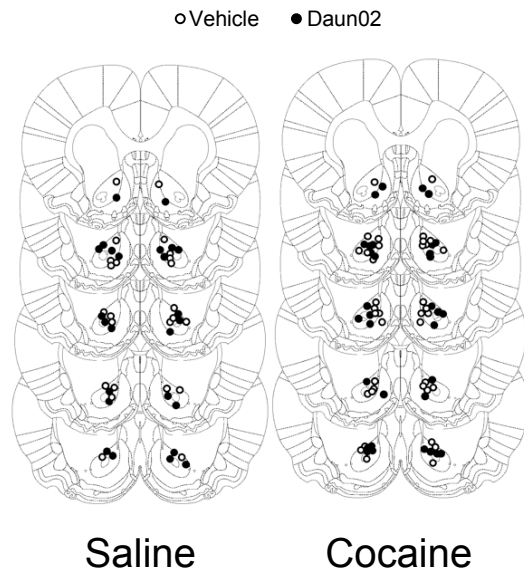

## Induction day injection

Figure vii: Nucleus accumbens infusion sites for Daun02 or vehicle in rats used for Experiment 2. Similar patterns of infusion sites were observed for Experiments 3-6. Drawings of coronal sections are adapted from Paxinos and Watson<sup>40</sup>.
